# Supplementary material
Source: publisher figshare collection journal article supplement (https://acs.figshare.com/ndownloader/files/4007752)
Supplement: Supplementary file 1 [file 4007752]

# Size-dependent Photoionization in Single CdSe/ZnS Nanocrystals

## Supporting Information

Kevin T. Early\* and David J. Nesbitt

*JILA, National Institute of Standards and Technology and University of Colorado,*

*Department of Chemistry and Biochemistry, University of Colorado*

*Boulder, CO 80309*

*Current affiliation: 3M, St. Paul, MN 55144*

*9/3/2013*

### Wavefunction calculations

Wavefunctions have been calculated for electron and hole charge carriers in the effective mass approximation according to techniques outlined by Haus, *et al.*, [1] and Schoos, *et al.* [2] Because of the rapid relaxation of the initial excitation into the 1S<sub>e</sub>-1S<sub>h</sub> band edge, the spherical harmonics are a constant and the radial wavefunction for the 1S-like states are considered. The radial function must satisfy the following conditions to yield physical results: 1)  $R_{1S}$  is finite at  $r=0$  and decays appropriately as  $r$  approaches infinity, 2) the first derivatives obey the continuity at the interface,

$$R_{1S,core}(r)\Big|_{r=a} = R_{1S,shell}(r)\Big|_{r=a},$$

where  $R_{1S,core}$  and  $R_{1S,shell}$  are the core and shell radial functions with the core/shell interface located at  $r = a$ , and 3) the effective-mass weighted first derivatives at  $r = a$  are matched according to

$$\frac{1}{m_{core}^*} \frac{dR_{1S,core}(r)}{dr} \Big|_{r=a} = \frac{1}{m_{shell}^*} \frac{dR_{1S,shell}(r)}{dr} \Big|_{r=a},$$

where  $m_{core}^*$  and  $m_{shell}^*$  denote the carrier effective masses in each layer. For this simple two-component system, the core and shell functions are described by spherical Bessel functions,  $R_{IS,core}(r) = A j_0(k_{IS}r)$  and  $R_{IS,core}(r) = B h_0^{(1)}(i\kappa_{IS}r)$  where  $j_0$  and  $h_0^{(1)}$  are spherical Bessel and Hankel functions,

$$k_{IS} = \sqrt{2m_{core}^*(E_{IS})/\hbar^2},$$

and

$$\kappa_{IS} = \sqrt{2m_{shell}^*(V - E_{IS})/\hbar^2}.$$

- (1) Haus, J. W.; Zhou, H. S.; Honma, I.; Komiyama, H. *Phys Rev B* **1993**, *47*, 1359.
- (2) Schooss, D.; Mews, A.; Eychmuller, A.; Weller, H. *Phys Rev B* **1994**, *49*, 17072.
